# Supplementary material for: On the atomic structure of thiol-protected gold nanoparticles: a combined experimental and theoretical study
Source: Royal Society of Chemistry journal article supplement (doi:10.1039/c004229c), 2010-01-01
Supplement: c004229c.pdf [file c004229c.pdf]

## Supporting Information

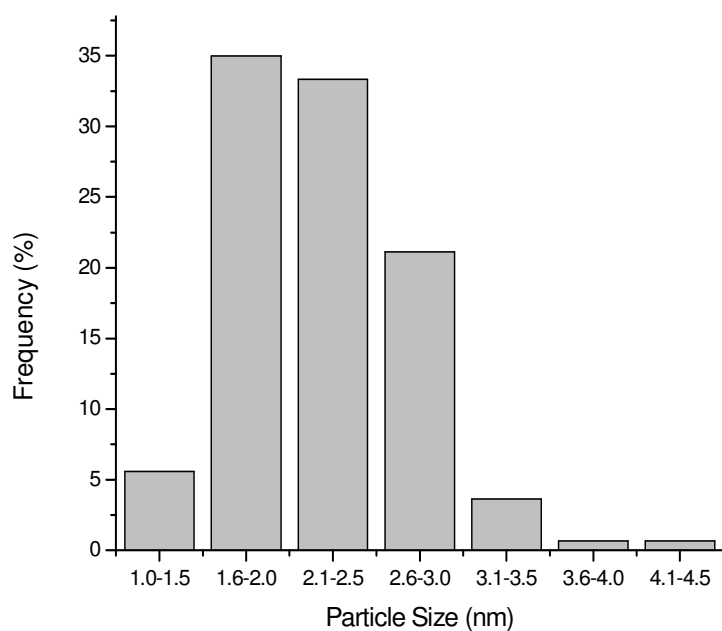

**S.1:** Particle size distribution, average size and standard deviation were based on the measurement of 303 nanoparticles. Random gold atom aggregates were not considered for statistics.

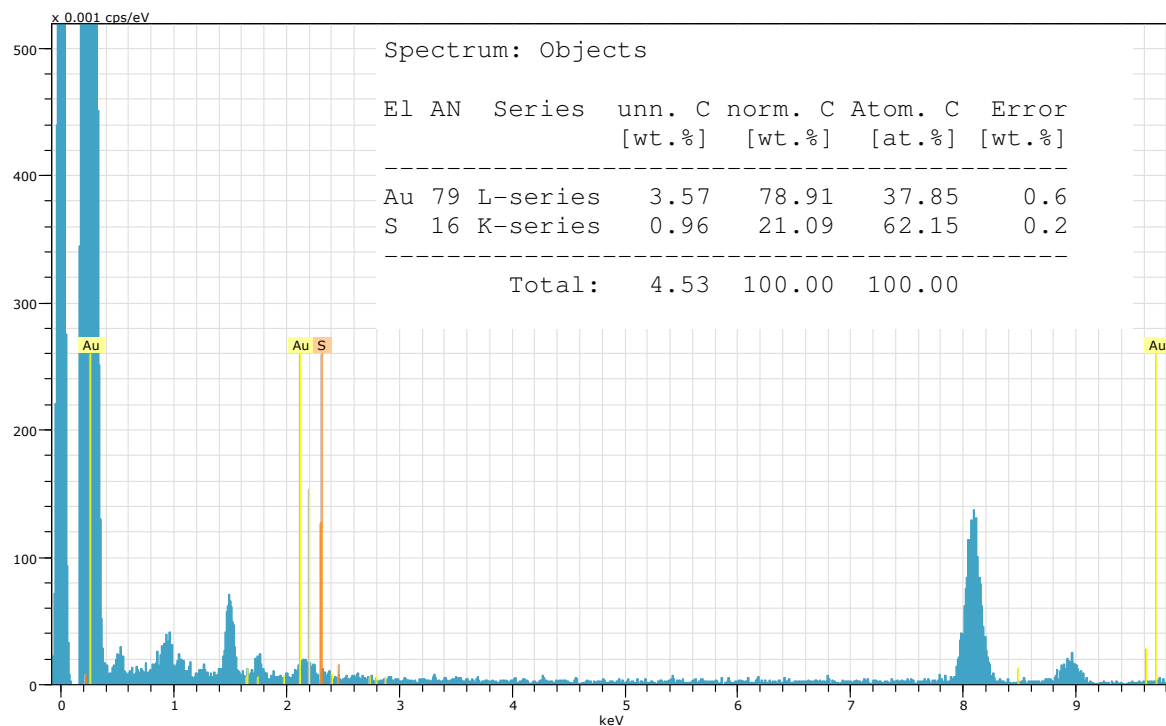

**S2:** Energy-dispersive X-ray (EDX) analysis of the thiol-capped Au nanoparticles
